# Supplementary material for: Genome editing in butterflies reveals that spalt promotes and Distal-less represses eyespot colour patterns
Source: PubMed Central journal article supplement (PMC4912622; doi:10.1038/ncomms11769), 2016-06-15
Supplement: ncomms11769-s1.pdf [file ncomms11769-s1.pdf]

1  
2

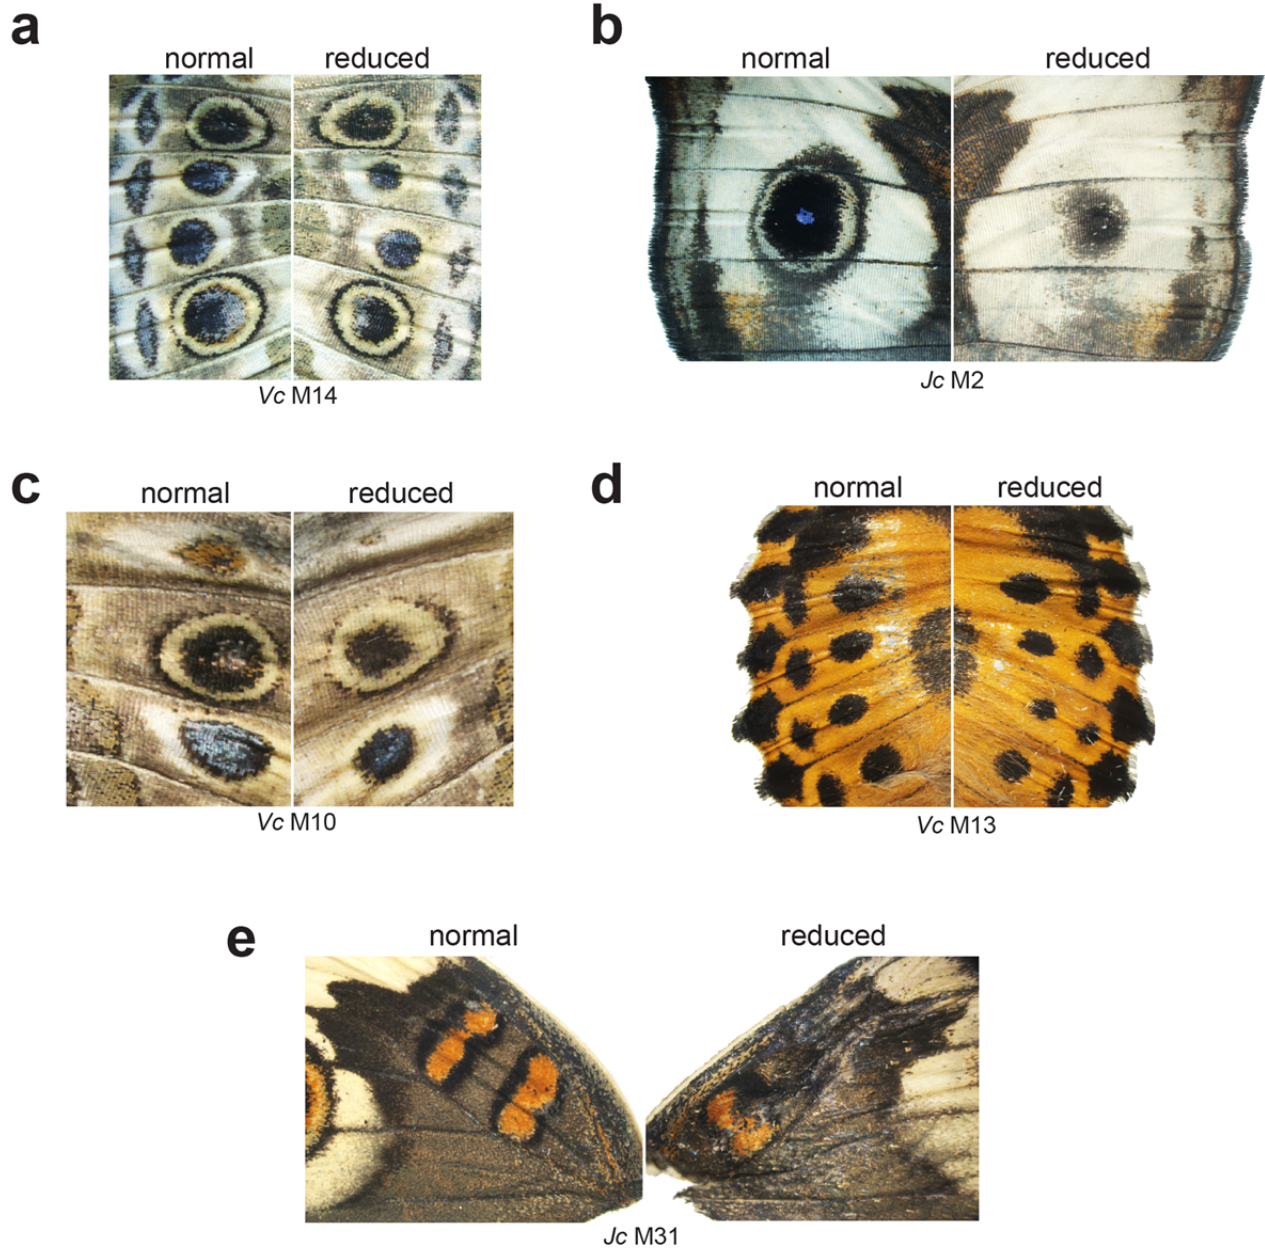

3  
4  
5  
6  
7  
8  
9

**Supplementary Figure 1: Additional examples of color pattern reduction caused by *spalt* deletions.** Examples of minor eyespot reduction phenotypes: (a) *V. cardui* ventral hindwing; (b) *J. coenia* ventral forewing; (c) *V. cardui* ventral hindwing; (d) *V. cardui* dorsal hindwing. (e) Loss of discal spot on a *J. coenia* dorsal forewing associated with vein abnormalities.

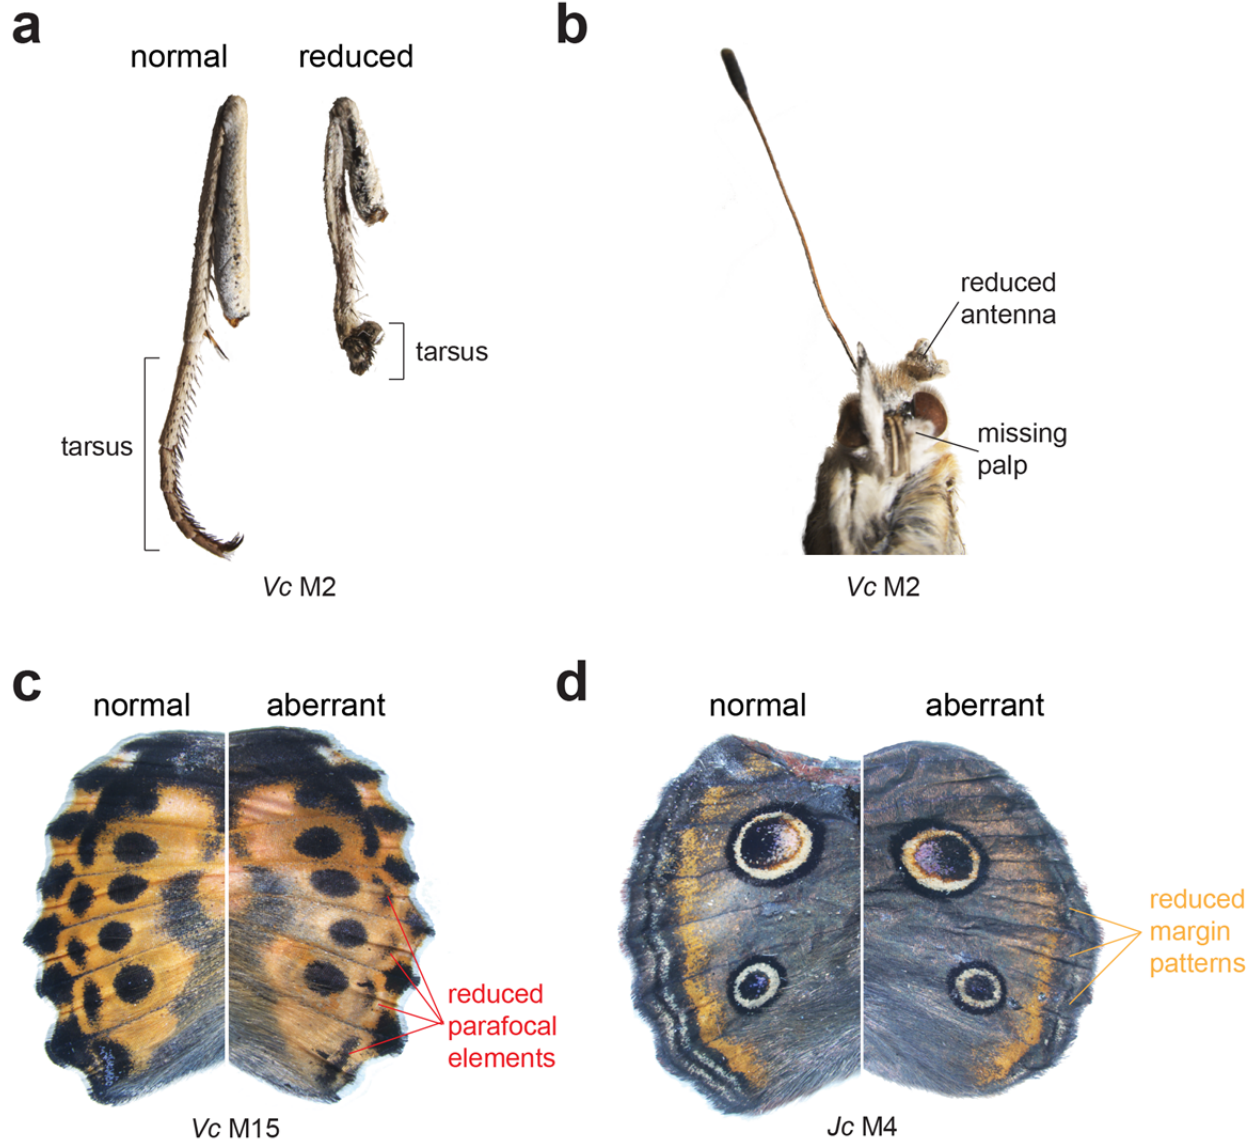

**Supplementary Figure 2: Additional examples of *Dll* deletion phenotypes.** (a) Reduction of the distal leg (tarsus) in *V. cardui*. (b) Bilateral reduction of antenna and palp in *V. cardui*. (c) Reduction of parafoveal elements on *V. cardui* dorsal hindwing. (d) Reduction of margin patterns on dorsal *J. coenia* hindwing.

10  
11  
12  
13  
14  
15  
16

Supplementary Table 1: sgRNAs and primers used in this study

| Target gene        | sgRNA name     | sgRNA sequence*                                                            | Genotyping primers             |
|--------------------|----------------|----------------------------------------------------------------------------|--------------------------------|
| <i>V. cardui</i>   | Vcddc_sgRNA1   | GAAATTAATACGACTCACTATA <b>GG</b> AGTACCGTTACCTGATGAGTTTTA GAGCTAGAAATAGC   | 5'-GCTGGATCAGCTATCGTCT         |
| <i>Ddc</i>         | Vcddc_sgRNA2   | GAAATTAATACGACTCACTATA <b>GG</b> TGGTCGTGTTTCAAGTAGAGTTTTA GAGCTAGAAATAGC  | 5'-GCAGTAGCCTTTACTTCCCTCCCAG   |
| <i>V. cardui</i>   | Vcspalt_sgRNA1 | GAAATTAATACGACTCACTATA <b>GG</b> ACCAATTTCAATAGCAACGTTTTAGAGCTAGAAATAGC    | 5'-AGCAACGAAGATCAAATTGGCAGA    |
| <i>spalt</i>       | Vcspalt_sgRNA2 | GAAATTAATACGACTCACTATA <b>GG</b> GGAATATTGGCGGAGGGAGTTTTAGAGCTAGAAATAGC    | 5'-ATGGGAGGGAAGCCGTTGTG        |
| <i>V. cardui</i>   | Vcdll_sgRNA1   | GAAATTAATACGACTCACTATA <b>GG</b> GCCTCCTCAGTCCTCGGAGTTTTAGAGCTAGAAATAGC    | 5'-GTGATAGTGATGCTGTGTACTGCAGTT |
| <i>Distal-less</i> | Vcdll_sgRNA2   | GAAATTAATACGACTCACTATA <b>GG</b> AGAATCCTCATGAAGCCTCGTTTTAGAGCTAGAAATAGC   | 5'-CGCACTGTGGAGCATAGGAACCT     |
| <i>J. coenia</i>   | Jcspalt_sgRNA1 | GAAATTAATACGACTCACTATA <b>GG</b> AACGTTTAGAACAAAGTGAGGGTTTTAGAGCTAGAAATAGC | 5'-CAATGCAAAATGGGAGAAGAACG     |
| <i>spalt</i>       | Jcspalt_sgRNA2 | GAAATTAATACGACTCACTATA <b>GG</b> TGGGTCTTCCCTTCCCGTTTTAGAGCTAGAAATAGC      | 5'-GAATTGTGCTACGGCAACTTTTGT    |
| <i>J. coenia</i>   | Jcdll_sgRNA1   | GAAATTAATACGACTCACTATA <b>GG</b> GCCTCCTCAGTCCTCGGAGTTTTAGAGCTAGAAATAGC    | 5'-TGGGGGCATAGGAACCTAAATG      |
| <i>Distal-less</i> | Jcdll_sgRNA2   | GAAATTAATACGACTCACTATA <b>GG</b> AAACCCTGATGCCTCGTGTGTTTTAGAGCTAGAAATAGC   | 5'-TTACCCGAATTCAATCCCCTAGTAC   |

\*: sgRNAs designed with GGN18NGG rule are marked with red GG; sgRNAs designed with N20NGG rule are marked with blue GG.
